# Supplementary material for: Effects of preservation duration at 4 °C on the quality of RNA in rabbit blood specimens
Source: PeerJ. 2020 Apr 10;8:e8940. doi: 10.7717/peerj.8940 (PMC7153556; doi:10.7717/peerj.8940)
Supplement: Supplemental Information 1 [file peerj-08-8940-s001.xlsx]

## Sheet: OD（Whole blood ）
		260/280	Concentration（ng/μl）
1h	1	1.99	34.5
1h	2	2.08	49.6
1h	3	1.95	34.6
1h	4	2.04	175.6
1h	5	2.09	518.5
1h	6	2.06	777.5
2h	1	2.03	147.1
2h	2	2.04	47.3
2h	3	1.91	544.2
2h	4	2.02	22.2
2h	5	2.01	562
2h	6	2.03	968.5
8h	1	2.03	42.6
8h	2	2.04	120.2
8h	3	2.02	137.7
8h	4	1.95	79.1
8h	5	1.97	324.6
8h	6	2.02	118.3
16h	1	2	39.2
16h	2	2.02	290.5
16h	3	1.99	338.5
16h	4	1.96	93.4
16h	5	1.96	542.6
16h	6	2.06	55.6
24h	1	1.98	69.4
24h	2	2.04	78.1
24h	3	1.92	53
24h	4	1.98	140.6
24h	5	1.93	348.7
24h	6	1.97	302.4
3d	1	1.97	321.4
3d	2	1.96	28
3d	3	1.94	239.8
3d	4	1.96	362.2
3d	5	1.99	127.6
3d	6	1.97	294.3
5d	1	2.05	100.3
5d	2	2.07	78.7
5d	3	2.06	49.9
5d	4	2	187
5d	5	2.01	127.2
5d	6	2	111.3
7d	1	1.99	626
7d	2	1.96	96.9
7d	3	1.92	176.5
7d	4	1.97	375.1
7d	5	1.94	148.4
7d	6	1.95	181.3

## Sheet: RIN（Whole blood ）
		RIN
1h	3
1h	2	9.2
1h	1
1h	4	8.3
1h	5	7.9
1h	6
2h	5	8.3
2h	2	10
2h	1	7.6
2h	3	8.4
2h	4	6.8
2h	6
8h	4	8.7
8h	6	8.6
8h	1	8.3
8h	2	7.9
8h	3	8.5
8h	5
16h	6	4.4
16h	1	5.1
16h	4
16h	2	8.3
16h	3	8.1
16h	5	8.9
24h	1
24h	2
24h	3	4.3
24h	4	9.4
24h	5	5.6
24h	6	8.9
3d	6
3d	5	6.8
3d	2
3d	1	6
3d	3	5.5
3d	4	3.4
5d	2	6.5
5d	1	6.2
5d	3	7.2
5d	4	8
5d	5	4
5d	6	5.1
7d	3	5.4
7d	2	5.7
7d	5
7d	1
7d	4	4.5
7d	6

## Sheet: qPCR(Whole blood)
	GAPDH	2	△Ct	△△Ct	2-△△Ct		GAPDH	3	△Ct	△△Ct	3-△△Ct		GAPDH	4	△Ct	△△Ct	4-△△Ct		GAPDH	5	△Ct	△△Ct	5-△△Ct		GAPDH	6	△Ct	△△Ct	6-△△Ct		GAPDH	7	△Ct	△△Ct	7-△△Ct
1h	20.67	24.49	3.82	0	1		20.26	26.575	6.315	0	1		20.26	28.48	8.22	0	1		20.26	24.395	4.135	0	1		20.26	24.5	4.24	0	1		20.26	24.9	4.64	0	1
	20.01	23.66	3.65	-0.17	1.12506		20.915	26.99	6.075	-0.24	1.18099		20.915	29.61	8.695	0.475	0.719467		20.915	25.315	4.4	0.265	0.832199		20.915	25.56	4.645	0.405	0.755236		20.915	25.53	4.615	-0.025	1.01748
	20.94	24.165					20.165	26.965	6.8	0.485	0.714497		20.165	29.015	8.85	0.63	0.646176		20.165	24.34	4.175	0.04	0.972655		20.165	24.99	4.825	0.585	0.666649		20.165	25.245	5.08	0.44	0.737135
							20.94	26.92
2h	20.435	24.39	3.955	0.135	0.91067		22.41	30.575	8.165	1.85	0.277392		22.41	33.29	10.88	2.66	0.15822		22.41	27.94	5.53	1.395	0.380245		22.41	27.995	5.585	1.345	0.393654		22.41	28.545	6.135	1.495	0.354781
	21.55	27.255	5.705	1.885	0.270744		20.245	27.34	7.095	0.78	0.582367		20.245	28.17	7.925	-0.295	1.22688		20.245	24.52	4.275	0.14	0.907519		20.245	24.46	4.215	-0.025	1.01748		20.245	25.415	5.17	0.53	0.692555
	21.48	23.58					19.66	27.42	7.76	1.445	0.367292		19.66	28.84	9.18	0.96	0.514057		19.66	23.82	4.16	0.025	0.982821		19.66	23.82	4.16	-0.08	1.05702		19.66	25.2	5.54	0.9	0.535887
							21.48	26.825
8h	18.875	23.02	4.145	0.325	0.798298		19.25	26.29	7.04	0.725	0.604997		19.25	28.395	9.145	0.925	0.526681		19.25	22.62	3.37	-0.765	1.69937		19.25	22.895	3.645	-0.595	1.51047		19.25	24.155	4.905	0.265	0.832199
	18.965	23.185	4.22	0.4	0.757858		18.855	25.665	6.81	0.495	0.709562		18.855	27.955	9.1	0.88	0.543367		18.855	22.675	3.82	-0.315	1.24401		18.855	22.73	3.875	-0.365	1.28788		18.855	24.205	5.35	0.71	0.61132
	19.28	22.46					19.65	27.24	7.59	1.275	0.413225		19.65	28.65	9	0.78	0.582367		19.65	24.065	4.415	0.28	0.823591		19.65	23.63	3.98	-0.26	1.19748		19.65	25.155	5.505	0.865	0.549046
							19.28	25.275
16h	19.12	23.21	4.09	0.27	0.82932		20.025	27.175	7.15	0.835	0.560583		20.025	28.575	8.55	0.33	0.795536		20.025	24.33	4.305	0.17	0.888843		20.025	24.41	4.385	0.145	0.904379		20.025	24.88	4.855	0.215	0.861546
	19.79	23.74	3.95	0.13	0.913831		19.46	26.875	7.415	1.1	0.466516		19.46	28.455	8.995	0.775	0.584389		19.46	23.6	4.14	0.005	0.99654		19.46	23.785	4.325	0.085	0.942785		19.46	24.285	4.825	0.185	0.879649
	19.73	22.975					20.325	27.515	7.19	0.875	0.545254		20.325	29.085	8.76	0.54	0.687771		20.325	25.02	4.695	0.56	0.678302		20.325	25.09	4.765	0.525	0.694959		20.325	25.69	5.365	0.725	0.604997
							19.73	26.605
24h	18.155	22.45	4.295	0.475	0.719467		19.04	27.295	8.255	1.94	0.260616		19.04	28.955	9.915	1.695	0.308855		19.04	23.165	4.125	-0.01	1.00696		19.04	22.915	3.875	-0.365	1.28788		19.04	25.125	6.085	1.445	0.367292
	19.11	22.54	3.43	-0.39	1.31039		18.49	26.285	7.795	1.48	0.358489		18.49	28.39	9.9	1.68	0.312083		18.49	22.465	3.975	-0.16	1.11729		18.49	22.31	3.82	-0.42	1.33793		18.49	24.515	6.025	1.385	0.382889
	19.28	22.375					19.795	26.345	6.55	0.235	0.849685		19.795	28.81	9.015	0.795	0.576343		19.795	24.24	4.445	0.31	0.806642		19.795	24.295	4.5	0.26	0.835088		19.795	25.145	5.35	0.71	0.61132
							19.28	26.235
3d	19.15	25.135	5.985	2.165	0.222982		19.175	28.095	8.92	2.605	0.164368		19.175	28.685	9.51	1.29	0.408951		19.175	23.285	4.11	-0.025	1.01748		19.175	23.17	3.995	-0.245	1.18509		19.175	25.24	6.065	1.425	0.372419
	18.96	23.075	4.115	0.295	0.815072		19.43	27.5	8.07	1.755	0.296273		19.43	28.65	9.22	1	0.5		19.43	23.485	4.055	-0.08	1.05702		19.43	23.435	4.005	-0.235	1.17691		19.43	25.575	6.145	1.505	0.35233
	20.51	22.91					18.82	26.89	8.07	1.755	0.296273		18.82	26.7	7.88	-0.34	1.26576		18.82	23.48	4.66	0.525	0.694959		18.82	22.88	4.06	-0.18	1.13288		18.82	25.28	6.46	1.82	0.283221
							20.51	26.93
5d	19.12	23.39	4.27	0.45	0.732043		19.02	26.695	7.675	1.36	0.389582		19.02	27.545	8.525	0.305	0.809442		19.02	23.095	4.075	-0.06	1.04247		19.02	22.965	3.945	-0.295	1.22688		19.02	26.055	7.035	2.395	0.190122
	18.765	22.07	3.305	-0.515	1.42899		19.67	26.2	6.53	0.215	0.861546		19.67	27.885	8.215	-0.005	1.00347		19.67	24.415	4.745	0.61	0.655197		19.67	23.94	4.27	0.03	0.97942		19.67	25.82	6.15	1.51	0.351111
	19.87	22.13					20.56	27.22	6.66	0.345	0.787308		20.56	28.91	8.35	0.13	0.913831		20.56	25.38	4.82	0.685	0.622006		20.56	25.315	4.755	0.515	0.699793		20.56	26.95	6.39	1.75	0.297302
							19.87	25.97
7d	19.005	23.055	4.05	0.23	0.852635		18.625	26.94	8.315	2	0.25		18.625	28.46	9.835	1.615	0.326465		18.625	23.27	4.645	0.51	0.702222		18.625	22.79	4.165	-0.075	1.05336		18.625	25.965	7.34	2.7	0.153893
	18.49	22.525	4.035	0.215	0.861546		19.39	26.79	7.4	1.085	0.471392		19.39	28.34	8.95	0.73	0.602904		19.39	24.07	4.68	0.545	0.685391		19.39	23.595	4.205	-0.035	1.02456		19.39	26.07	6.68	2.04	0.243164
	20.02	22.475					20.44	27.195	6.755	0.44	0.737135		20.44	28.83	8.39	0.17	0.888843		20.44	25.51	5.07	0.935	0.523042		20.44	25.195	4.755	0.515	0.699793		20.44	26.505	6.065	1.425	0.372419
							20.02	25.89

## Sheet: OD(Leukocyte)
	RNA	260/280	Concentration（ng/μl）					RNA	260/280	Concentration（ng/μl）
1h	1-11	1.97	125.4				24h	4-5	1.92	186.6
1h	4-11	1.93	98.9				24h	4-6	1.84	158.6
1h	5-2(2)	1.99	49.5				24h	5-5(1)	2.05	101.6
1h	4-20(1)	1.89	35.6				24h	1-5	2.04	127.7
1h	4-20(2)	1.92	33.3				24h	1-6	2.02	28.2
1h	4-11	2.08	33.4				24h	2-6	1.96	100.7
1h	5-1(1)	2.04	118				24h	3-5	1.95	130.4
1h	5-1(2)	1.95	257.2				24h	3-6	1.88	511.4
1h	1-19	1.93	243.3				24h	1-13	1.94	280.3
1h	6-1	1.95	212.5				24h	5-6	1.98	282.8
1h	4-21	1.82	82.6				24h	1-13	1.95	191.8
2h	4-28(1)	1.99	17				3d	4-14(1)	1.93	177.8
2h	4-28(2)	2	53.7				3d	4-14(2)	1.97	311.3
2h	1-20(1)	1.97	49.2				3d	1-7	1.97	49.5
2h	1-20(2)	1.9	149.2				3d	2-7	2.06	23.7
2h	4	1.98	132				3d	3-7	1.96	265
2h	5	2.09	153				3d	4-7	1.91	809.1
2h	5-3	1.91	241.1				3d	1-14(1)	1.89	222.4
2h	5-4	1.92	139.6				3d	1-14(2)	1.95	622.2
2h	4-22(1)	1.97	158.3				3d	5-7	1.85	172
2h	4-22(2)	1.96	195.4				3d	5-8	1.95	120.1
2h	6-2	1.89	65.1
8h	3-4	2.03	32.9				5d	4-26(1)	2	123.8
8h	4-3	1.95	145.8				5d	4-26(2)	1.94	128.7
8h	4-4	2.02	111.4				5d	1-8	1.92	101.4
8h	1-3	1.9	111.6				5d	2-8	2.08	84.2
8h	1-4	2.01	104.4				5d	3-8	1.96	72.2
8h	2-3	1.96	195.4				5d	4-8	2	231.6
							5d	4-25(1)	1.94	155.8
							5d	4-25(2)	1.96	36.7
							5d	6-5	1.93	185.5
							5d	6-6	1.9	112.7
16h	1-21(1)	1.94	67.4				7d	1-16	1.94	674.4
16h	1-21(2)	1.97	152.6				7d	1-17	1.9	288.9
16h	1-21(3)	1.92	152.5				7d	1-18	1.98	96.1
16h	4-23	1.88	14.2				7d	2-9	1.98	69.7
16h	4-23(1)	2.02	33.4				7d	3-9	2.02	61.6
16h	4-24(2)	1.94	90.6				7d	3-10	1.93	127.5
16h	4-24(3)	1.96	36.4				7d	1-15(1)	1.92	265.2
16h	4-24(4)	1.92	50.9				7d	1-15(2)	1.89	535.8
16h	1-22(1)	1.97	311.3				7d	4-9	1.91	440.9
16h	1-22(2)	1.98	71.9				7d	5-9(1)	1.94	283
16h	1-22(3)	2	36.7				7d	5-9(2)	1.93	529.2
16h	1-22(4)	1.96	156.9				7d	5-10(1)	1.93	431.8
16h	6-4(2)	1.86	115.2				7d	5-10(2)	1.86	497.1

## Sheet: RIN(Leukocyte)
20181011	RNA	RIN
1h	5-2(1)	9.5
1h	5-1(1)	9.4
1h	4-11	8.4
1h	4-11	8
1h	5-1(2)	8.2
1h	4-20(2)	8.8
1h	1-11	8.5
2h	4-22(1)	9
2h	4-22(1)	9
2h	4-22(1)	9.2
2h	5-4	8.9
2h	5-3	9.5
2h	5-3	9.2
2h	5-4	8.7
2h	4-28(2)	7.6
2h	1-20(1)	8.6
8h	4-3	9.2
8h	4-3	9.6
8h	4-3	9
8h	3-4	8.5
8h	3-4	9
8h	3-4	8.8
16h	1-22(4)	8.4
16h	1-22(2)	8.9
16h	1-22(4)	8.7
16h	4-23(1)	9.4
16h	4-24	8.6
16h	1-22(1)	7.9
16h	1-21(3)	7
16h	4-24(2)	8.5
24h	3-5	8.9
24h	1-5	8.8
24h	2-6	6.4
24h		8.9
24h	5-6	8.9
3d	3-7	8.9
3d	1-14(1)	9
3d	5-8	8.8
3d	4-7	8.6
3d	4-14(1)	8.3
3d	4-14(2)	8.1
5d	1-8	7.2
5d	4-25(2)	9
5d	4-25(1)	8.1
5d	1-8	8
5d	4-26(2)	8.8
5d	5-7	8.9
5d	6-5	8.9
7d	5-9(1)	9
7d	3-10	8
7d	5-10(1)	8.1
7d	3-9	7.4
7d	1-18	8
7d	5-9(2)	6.8

## Sheet: qPCR(Leukocyte)
	GAPDH	2	△Ct	△△Ct	2-△△Ct		GAPDH	3	△Ct	△△Ct	2-△△Ct		GAPDH	4	△Ct	△△Ct	2-△△Ct		GAPDH	5	△Ct	△△Ct	2-△△Ct		GAPDH	6	△Ct	△△Ct	2-△△Ct		GAPDH	7	△Ct	△△Ct	2-△△Ct
1h	18.81	24.57	5.76	0	1		18.785	23.535	4.75	0	1		18.785	27	8.215	0	1		18.945	22.485	3.54	0	1		18.81	24.74	5.93	0	1		18.81	24.075	5.265	0	1
	19.94	26.575	6.635	0.875	0.545254		20.01	24.975	4.965	0.215	0.861546		20.01	28.865	8.855	0.64	0.641713		20.01	24.855	4.845	1.305	0.404721		20.01	25.71	5.7	-0.23	1.17283		20.01	24.925	4.915	-0.35	1.27456
	18.64	26.575	7.935	2.175	0.221442		18.565	24.27	5.705	0.955	0.515842		18.565	27.02	8.455	0.24	0.846745		18.565	22.98	4.415	0.875	0.545254		18.565	24.24	5.675	-0.255	1.19334		18.565	22.295	3.73	-1.535	2.89788
	21.535	25.69	4.155	-1.605	3.04196		21.47	27.975	6.505	1.755	0.296273		21.47	30.465	8.995	0.78	0.582367		21.47	26.575	5.105	1.565	0.337978		21.47	28.74	7.27	1.34	0.395021		21.47	27.34	5.87	0.605	0.657471
	21.405	27.03	5.625	-0.135	1.09809		21.405	27.805	6.4	1.65	0.31864		21.405	30.94	9.535	1.32	0.400535		21.405	25.91	4.505	0.965	0.512278								21.405	25.9	4.495	-0.77	1.70527
	18.06	24.475	6.415	0.655	0.635075														19.87	25.23	5.36	1.82	0.283221
	19.87	25.89	6.02	0.26	0.835088														20.505	27.33	6.825	3.285	0.102593
	18.415	24.03	5.615	-0.145	1.10573
	20.505	28.37	7.865	2.105	0.232451
2h	20.205	23.17	2.965	-2.795	6.94031		19.835	24.745	4.91	0.16	0.895025		19.835	26.1	6.265	-1.95	3.86375		20.095	25.59	5.495	1.955	0.257921		20.205	27.89	7.685	1.755	0.296273		20.205	27.675	7.47	2.205	0.216885
	19.215	24.77	5.555	-0.205	1.15269		19.455	24.64	5.185	0.435	0.739694		19.455	28.915	9.46	1.245	0.421908		19.455	23.325	3.87	0.33	0.795536		19.455	24.705	5.25	-0.68	1.60214		19.455	24.16	4.705	-0.56	1.47427
	19.57	24.77	5.2	-0.56	1.47427		19.39	25.815	6.425	1.675	0.313166		19.39	28.47	9.08	0.865	0.549046		19.39	24.14	4.75	1.21	0.432269		19.39	24.975	5.585	-0.345	1.27015		19.39	22.91	3.52	-1.745	3.35195
	20.58	25.215	4.635	-1.125	2.18102		20.47	24.94	4.47	-0.28	1.21419		20.47	29.24	8.77	0.555	0.680657		20.47	24.365	3.895	0.355	0.78187		20.47	26.205	5.735	-0.195	1.14472		20.47	24.4	3.93	-1.335	2.52275
	20.435	26.27	5.835	0.075	0.949342		20.435	24.88	4.445	-0.305	1.23542		20.435	29.085	8.65	0.435	0.739694		20.435	24.615	4.18	0.64	0.641713								20.435	24.09	3.655	-1.61	3.05252
	19.76	23.125	3.365	-2.395	5.25977														19.7	24.21	4.51	0.97	0.510506
	19.7	24.45	4.75	-1.01	2.01391														20.205	24.595	4.39	0.85	0.554785
	19.075	24.645	5.57	-0.19	1.14076
	20.205	25.535	5.33	-0.43	1.34723
8h	20.075	26.09	6.015	0.255	0.837987		19.11	22.315	3.205	-1.545	2.91804		19.11	28.41	9.3	1.085	0.471392		19.645	24.815	5.17	1.63	0.323088		20.075	27.005	6.93	1	0.5		20.075	24.675	4.6	-0.665	1.58557
	19.76	26.68	6.92	1.16	0.447513		19.885	23.19	3.305	-1.445	2.72263		19.885	29.225	9.34	1.125	0.458502		19.885	25.035	5.15	1.61	0.327598		19.885	26.465	6.58	0.65	0.63728		19.885	25.865	5.98	0.715	0.609205
	19.505	26.68	7.175	1.415	0.37501		19.255	25.59	6.335	1.585	0.333325		19.255	28.065	8.81	0.595	0.662044		19.255	23.735	4.48	0.94	0.521233		19.255	24.29	5.035	-0.895	1.85961		19.255	22.23	2.975	-2.29	4.89056
	19.61	25.235	5.625	-0.135	1.09809		19.575	25.7	6.125	1.375	0.385553		19.575	28.825	9.25	1.035	0.488016		19.575	24.505	4.93	1.39	0.381565		19.575	25.155	5.58	-0.35	1.27456		19.575	23.45	3.875	-1.39	2.62079
	20.17	26.175	6.005	0.245	0.843816		20.17	23.43	3.26	-1.49	2.80889		20.17	29.08	8.91	0.695	0.617709		20.17	25.29	5.12	1.58	0.334482								20.17	24.99	4.82	-0.445	1.36131
	19.41	26	6.59	0.83	0.562529														19.555	25.475	5.92	2.38	0.192109
	19.555	25.94	6.385	0.625	0.64842														19.575	24.505	4.93	1.39	0.381565
	18.995	24.805	5.81	0.05	0.965936
	19.575	25.97	6.395	0.635	0.643941
16h	18.395	24.04	5.645	-0.115	1.08298		18.045	23.61	5.565	0.815	0.568408		18.045	26.58	8.535	0.32	0.80107		18.3	22.74	4.44	0.9	0.535887		18.395	25.27	6.875	0.945	0.51943		18.395	23.72	5.325	0.06	0.959264
	19.395	26.865	7.47	1.71	0.30566		19.8	25.875	6.075	1.325	0.399149		19.8	29.215	9.415	1.2	0.435275		19.8	25.235	5.435	1.895	0.268874		19.8	27.06	7.26	1.33	0.397768		19.8	26.78	6.98	1.715	0.304603
	19.86	26.865	7.005	1.245	0.421908		19.615	25.085	5.47	0.72	0.607097		19.615	28.71	9.095	0.88	0.543367		19.615	24.665	5.05	1.51	0.351111		19.615	25.13	5.515	-0.415	1.3333		19.615	24.265	4.65	-0.615	1.53156
	21.645	27.06	5.415	-0.345	1.27015		21.545	26.855	5.31	0.56	0.678302		21.545	29.965	8.42	0.205	0.867539		21.545	26.12	4.575	1.035	0.488016		21.545	28.455	6.91	0.98	0.50698		21.545	26.875	5.33	0.065	0.955945
	21.25	27.21	5.96	0.2	0.870551		21.25	26.65	5.4	0.65	0.63728		21.25	30.015	8.765	0.55	0.68302		21.25	25.89	4.64	1.1	0.466516								21.25	27.38	6.13	0.865	0.549046
	17.685	24.015	6.33	0.57	0.673617														20.155	25.945	5.79	2.25	0.210224
	20.155	26.375	6.22	0.46	0.726986														21.215	26.74	5.525	1.985	0.252613
	19.575	25.575	6	0.24	0.846745
	21.215	27.04	5.825	0.065	0.955945
24h	19.87	25.55	5.68	-0.08	1.05702		22.32	28.515	6.195	1.445	0.367292		22.32	30.8	8.48	0.265	0.832199		19.68	23.96	4.28	0.74	0.598739		19.87	25.305	5.435	-0.495	1.40932		19.87	24.28	4.41	-0.855	1.80876
	19.465	25.695	6.23	0.47	0.721965		19.325	24.39	5.065	0.315	0.803851		19.325	28.58	9.255	1.04	0.486327		19.325	23.98	4.655	1.115	0.461691		19.325	24.78	5.455	-0.475	1.38992		19.325	24.52	5.195	-0.07	1.04972
	19.035	25.695	6.66	0.9	0.535887		19.025	23.195	4.17	-0.58	1.49485		19.025	28.555	9.53	1.315	0.401925		19.025	24.335	5.31	1.77	0.293209		19.025	24.88	5.855	-0.075	1.05336		19.025	24.21	5.185	-0.08	1.05702
	19.57	25.25	5.68	-0.08	1.05702		19.225	23.055	3.83	-0.92	1.89212		19.225	28.425	9.2	0.985	0.505226		19.225	24.59	5.365	1.825	0.282241		19.225	25.315	6.09	0.16	0.895025		19.225	24.96	5.735	0.47	0.721965
	21.08	27.17	6.09	0.33	0.795536		21.08	28.88	7.8	3.05	0.120742		21.08	31.005	9.925	1.71	0.30566		21.08	26.65	5.57	2.03	0.244855								21.08	26.585	5.505	0.24	0.846745
	19.04	25.135	6.095	0.335	0.792784														19.595	25.165	5.57	2.03	0.244855
	19.595	25.56	5.965	0.205	0.867539														19.42	25.085	5.665	2.125	0.229251
	18.815	24.885	6.07	0.31	0.806642
	19.42	23.85	4.43	-1.33	2.51403
3d	19.7	24.78	5.08	-0.68	1.60214		19.255	23.1	3.845	-0.905	1.87254		19.255	28.305	9.05	0.835	0.560583		19.37	23.715	4.345	0.805	0.572362		19.7	24.91	5.21	-0.72	1.64718		19.7	24.57	4.87	-0.395	1.31494
	20.17	27.3	7.13	1.37	0.386891		19.735	26.77	7.035	2.285	0.205185		19.735	30.265	10.53	2.315	0.200963		19.735	26.08	6.345	2.805	0.143091		19.735	26.675	6.94	1.01	0.496546		19.735	27.275	7.54	2.275	0.206613
	19.455	27.3	7.845	2.085	0.235696		19.165	23.555	4.39	-0.36	1.28343		19.165	28.93	9.765	1.55	0.34151		19.165	24.365	5.2	1.66	0.316439		19.165	25.215	6.05	0.12	0.920188		19.165	24.05	4.885	-0.38	1.30134
	20.365	27.45	7.085	1.325	0.399149		21.465	27.48	6.015	1.265	0.416099		21.465	30.025	8.56	0.345	0.787308		21.465	25.605	4.14	0.6	0.659754		21.465	25.835	4.37	-1.56	2.94854		21.465	26.44	4.975	-0.29	1.22264
	21.575	28.77	7.195	1.435	0.369847		21.575	29.07	7.495	2.745	0.149167		21.575	31.63	10.055	1.84	0.279322		21.575	28.22	6.645	3.105	0.116226								21.575	28.35	6.775	1.51	0.351111
	19.065	24.875	5.81	0.05	0.965936														20.25	26.3	6.05	2.51	0.175556
	20.25	26.905	6.655	0.895	0.537747														21.04	25.945	4.905	1.365	0.388234
	18.825	25.97	7.145	1.385	0.382889
	21.04	27.76	6.72	0.96	0.514057
5d	18.8	24.13	5.33	-0.43	1.34723		18.18	24.665	6.485	1.735	0.300409		18.18	26.65	8.47	0.255	0.837987		18.5	22.33	3.83	0.29	0.817902		18.8	25.025	6.225	0.295	0.815072		18.8	24.525	5.725	0.46	0.726986
	20.33	28.08	7.75	1.99	0.251739		20.615	26.475	5.86	1.11	0.463294		20.615	30.435	9.82	1.605	0.328736		20.615	26.75	6.135	2.595	0.165511		20.615	27.355	6.74	0.81	0.570382		20.615	28.05	7.435	2.17	0.222211
	19.98	28.08	8.1	2.34	0.19751		20.43	27.57	7.14	2.39	0.190782		20.43	30.335	9.905	1.69	0.309927		20.43	25.88	5.45	1.91	0.266093		20.43	26.255	5.825	-0.105	1.07549		20.43	26.42	5.99	0.725	0.604997
	20.185	25.225	5.04	-0.72	1.64718		20.465	24.415	3.95	-0.8	1.7411		20.465	28.255	7.79	-0.425	1.34257		20.465	24.84	4.375	0.835	0.560583		20.465	24.68	4.215	-1.715	3.28297		20.465	25.665	5.2	-0.065	1.04608
	21.72	28.24	6.52	0.76	0.590496		21.72	27.935	6.215	1.465	0.362236		21.72	31.81	10.09	1.875	0.272627		21.72	27.865	6.145	2.605	0.164368								21.72	28.65	6.93	1.665	0.315344
	18.565	24.175	5.61	-0.15	1.10957														20.85	27.05	6.2	2.66	0.15822
	20.85	27.695	6.845	1.085	0.471392														20.11	25.45	5.34	1.8	0.287175
	20.505	27.22	6.715	0.955	0.515842
	20.11	24.465	4.355	-1.405	2.64818
7d	21.475	26.465	4.99	-0.77	1.70527		20.925	26.92	5.995	1.245	0.421908		20.925	29.34	8.415	0.2	0.870551		20.525	25.295	4.77	1.23	0.426317		21.475	27.255	5.78	-0.15	1.10957		21.475	26.84	5.365	0.1	0.933033
	19.96	26.475	6.515	0.755	0.592546		20.075	23.905	3.83	-0.92	1.89212		20.075	29.845	9.77	1.555	0.340329		20.075	25.96	5.885	2.345	0.196827		20.075	26.795	6.72	0.79	0.578344		20.075	27.29	7.215	1.95	0.258816
	19.76	26.475	6.715	0.955	0.515842		19.995	25.985	5.99	1.24	0.423373		19.995	28.555	8.56	0.345	0.787308		19.995	25.115	5.12	1.58	0.334482		19.995	26.025	6.03	0.1	0.933033		19.995	25.475	5.48	0.215	0.861546
	21.45	27.275	5.825	0.065	0.955945		21.83	25.505	3.675	-1.075	2.10672		21.83	30.455	8.625	0.41	0.752623		21.83	27.05	5.22	1.68	0.312083		21.83	27.185	5.355	-0.575	1.48968		21.83	28.81	6.98	1.715	0.304603
	21.155	27.61	6.455	0.695	0.617709		21.155	27.985	6.83	2.08	0.236514		21.155	30.795	9.64	1.425	0.372419		21.155	27.065	5.91	2.37	0.193446								21.155	28.105	6.95	1.685	0.311003
	21.065	26.495	5.43	-0.33	1.25701														20.21	26.14	5.93	2.39	0.190782
	20.21	25.87	5.66	-0.1	1.07177														20.85	27.61	6.76	3.22	0.107321
	20.17	25.83	5.66	-0.1	1.07177
	20.85	25.955	5.105	-0.655	1.57462
